# Supplementary material
Source: PubMed Central journal article supplement (PMC1829371)
Supplement: 7601601s1.pdf [file 7601601s1.pdf]

Gorski et al.,  
Supplement, Figure S1

hTAF<sub>41</sub> 1 MDKSGIDSLDHVTSDAVELANRSDNSSDSLFKTCIPYSPKGEKRNPIRKFFVRTPESVH  
mTAF<sub>41</sub> 1 MAQSEVNSVCVASDRAGDTGDQSSDSSDGLFKTCAP-SPIQQRHP TVKRVTLPASVE

hTAF<sub>41</sub> 61 ASDSSSDSSFEP IPLTIKAI FERFKN--RKKRYKKKKRRYQPTGRPRGRPEGRRNPIYS  
mTAF<sub>41</sub> 60 T-DSSSDSSI EPRPLTLKAI FERFKKKKRRKRKKRKYEPKLRPRGRPRGKPSGTRITRRS

hTAF<sub>41</sub> 119 LIDKKKQFRSRGSGFPFLESEN-EKNAPWRKILTFEQAVARGFFNYIEKLYEHLKESL  
mTAF<sub>41</sub> 119 QIDAK-QIKDKGAVFPFLESESGRKPLPWKILTYEQAVARGFFHHIEKLYEHLKECL

hTAF<sub>41</sub> 178 KQMNVGEDLENEFD SRRYKFLDDDGSISPIEESTA EDEDATHLEDNECDIKLAGDS-FI  
mTAF<sub>41</sub> 178 KQMHAGEDLEKEDLDSRRHKYMDDDGSLSPIEEPLTEDEATN--PQAECDIKLVEDSCFI

hTAF<sub>41</sub> 237 VSSEFPVRLSVYLEEEDI TEEAALSKKR--ATKAKNTGQRGLKM 278  
mTAF<sub>41</sub> 236 ISSEFSRKR--NLEQEKIKK ESTFSKKAKDATHREKGHRRTLEGNEHV TIEEDSRPQPRP

mTAF<sub>41</sub> 294 FAHLQSKVMKKGELEYLEVHHL CGLSQPL 322
