# Supplementary material
Source: PubMed Central journal article supplement (PMC1829371)

Gorski et al.,  
Supplement, Figure S2

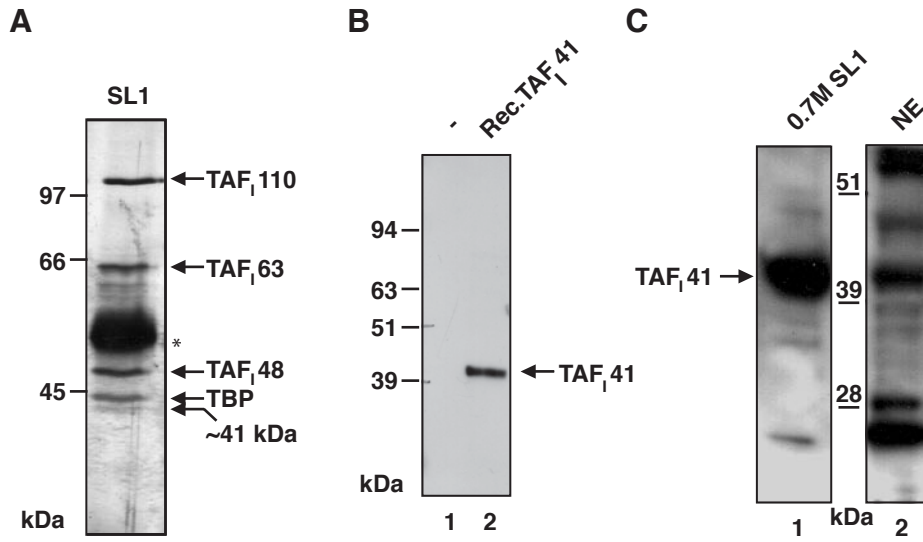

Supplement: 7601601s2.pdf [file 7601601s2.pdf]

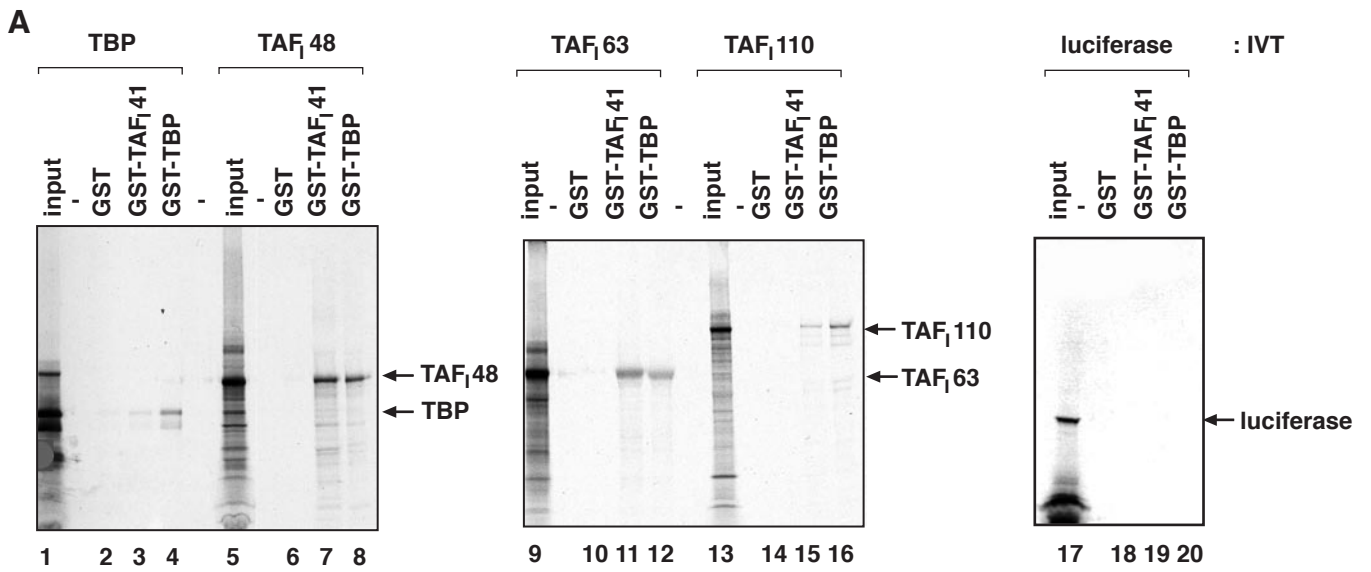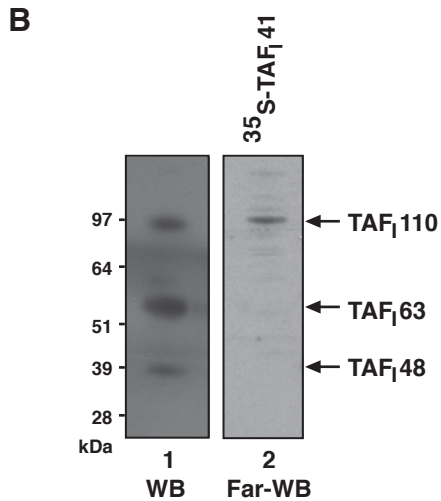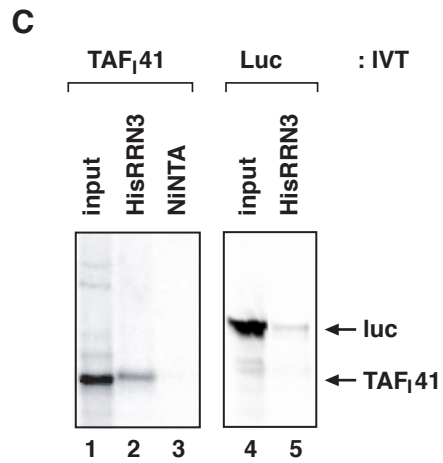

Supplement: 7601601s3.pdf [file 7601601s3.pdf]
